1 **Rapid and efficient generation of antigen-specific isogenic T cells from**  
2 **cryopreserved blood samples**

3 AL Eerkens<sup>1,2</sup>, A Vledder<sup>1,2</sup>, N van Rooij<sup>1</sup>, F Foijer<sup>3</sup>, HW Nijman<sup>1,4</sup>, M de Bruyn<sup>1,4</sup>

4 <sup>1</sup>University of Groningen, University Medical Center Groningen, Department of Obstetrics and Gynecology, The Netherlands.

5 <sup>2</sup>Contributed equally

6 <sup>3</sup>University of Groningen, University Medical Center Groningen, European Research Institute for the Biology of Ageing, The Netherlands.

7 <sup>4</sup>Shared senior authorship

8

9

10

11

12

13

14 **Corresponding author:**

15 Dr. M. de Bruyn

16 University Medical Center Groningen

17 CMC V, 4e floor room Y4.240

18 PO 30.001

19 9700 RB Groningen

20 Tel + 31 (0)50 3613174

21 Fax + 31 (0)50 3611806

22 Email [m.de.bruyn@umcg.nl](mailto:m.de.bruyn@umcg.nl)

23

24

25

26

27 **Word Count:** 1933

28 **Abstract:** 243

29 **Tables/Figures:** 4

30 **References:** 23

31

32 **ABSTRACT**

33 **Objectives** CRISPR/Cas9-mediated gene editing has been leveraged for the modification of human and  
34 mouse T cells. However, limited experience is available on the application of CRISPR/Cas9  
35 electroporation in cryopreserved T cells collected during e.g. clinical trials.

36 **Methods** PBMCs from healthy donors were used to generate knockout T cell models for interferon- $\gamma$   
37 (IFN $\gamma$ ), Cbl Proto-Oncogene B (CBLB), Fas cell surface death receptor (Fas) and T cell receptor (TCR $\alpha\beta$ )  
38 genes. The effect of CRISPR-cas9-mediated gene editing on T cells was evaluated using apoptosis  
39 assays, cytokine bead arrays and *ex vivo* and *in vitro* stimulation assays.

40 **Results** Our results demonstrate that CRISPR/Cas9-mediated gene editing of *ex vivo* T cells is efficient  
41 and does not overtly affect T cell viability. Cytokine release and T cell proliferation were not affected in  
42 gene edited T cells. Interestingly, memory T cells were more susceptible to CRISPR/Cas9 gene editing  
43 than naïve T cells. *Ex vivo* and *in vitro* stimulation with antigens resulted in equivalent antigen-specific  
44 T cell responses in gene-edited and untouched control cells; making CRISPR/Cas9-mediated gene  
45 editing compatible with clinical antigen-specific T cell activation and expansion assays.

46 **Conclusion** Here, we report an optimized protocol for rapid, viable and highly efficient genetic  
47 modification in *ex vivo* human antigen specific T cells, for subsequent functional evaluation and/or  
48 expansion. Our platform extends CRISPR/Cas9-mediated gene editing for use in gold-standard  
49 clinically-used immune-monitoring pipelines and serves as a starting point for development of  
50 analogous approaches such as those including transcriptional activators and or epigenetic modifiers.

51

52

53

## 54 INTRODUCTION

55 CRISPR/Cas9-mediated gene targeting has been used to significantly improve our understanding of T  
56 cell biology and discover regulators of e.g. T cell proliferation and differentiation (1–3). To date, most of  
57 this work has been performed using cultured peripheral blood mononuclear cells (PBMCs) from healthy  
58 donors, or using patient T cells after an initial *ex vivo* expansion (3). In this setting, cell numbers are not  
59 limited and there is generally no need to maintain the clonal repertoire of T cells. By contrast, samples  
60 obtained within clinical trials in immune oncology are generally limited and antigen-specificity  
61 paramount in understanding the underlying immune biology (4–6). Expanding the CRISPR/Cas9 toolbox  
62 to antigen-specific T cells from clinical samples would therefore enable further dissection of anti-cancer  
63 immune responses and discovery of novel targets for combination immunotherapy (1).

64         Herein, special consideration should be given to maintaining the *ex vivo* T cells' phenotype and  
65 function during the process of gene engineering (4,7). In addition, a CRISPR/Cas9-mediated gene  
66 targeting protocol for clinical samples should ideally be compatible with the timelines used in best-  
67 practice immunomonitoring protocols. As such, viral-mediated transfection models, such as lentivirus,  
68 adenovirus and retrovirus with variable knockout efficiencies and T cell toxicity are unsuitable (8–10).  
69 Ribonucleoprotein (RNP) complexes of Cas9 and a guide RNA (gRNA), when introduced by  
70 electroporation, have been reported as suitable for *ex vivo* modification of T cells, but whether a high-  
71 level of viability and clonality can be maintained for incorporation into immune monitoring protocols  
72 remains unclear (8,9).

73         Here, we report on an optimized protocol for rapid, viable, and highly efficient genomic  
74 manipulation in *ex vivo* human antigen-specific T cells. We demonstrate the efficacy of this gene editing  
75 system within common immunomonitoring pipelines and across gRNAs. This system is robust across  
76 donors and useable for gene editing in both memory and naïve T cells for studying recall and *de novo*  
77 responses, respectively.

78

## 79 RESULTS

### 80 CRISPR/Cas9-mediated gene editing of ex vivo T cells does not overtly affect T cell viability

81 We set out to optimize a CRISPR/Cas9-mediated gene editing protocol compatible with PBMC samples  
82 analogous to those routinely procured during clinical trials. PBMCs were processed according to best  
83 practice operating protocols for PBMC isolation, cryopreservation and cell density used in storage. Using  
84 these standardized PBMC aliquots, we first optimized RNP complex electroporation using efficiency and  
85 viability as main parameters. As proof-of-concept, we targeted IFN $\gamma$  as it is not expressed *ex vivo* in T  
86 cells, readily induced upon activation and easily assessable by ELISA or intracellular flow cytometry.  
87 Electroporation of Cas9/IFN $\gamma$ -gRNA RNP complexes into T cells resulted in almost complete abrogation  
88 of IFN $\gamma$  expression in both CD8 and CD4 T cells (figure 1a, c). Electroporation, inclusion of Cas9/gRNA  
89 complexes and/or crRNA alone, had no effect on T cell viability as measured using amine-reactive dye  
90 staining (figure 1b, e). By varying experimental parameters, we observed that while Cas9 protein  
91 concentration did not affect T cell viability, the size of the electroporation cuvette was critically  
92 important, resulting in a reduced relative viability when using 20  $\mu$ L cuvettes compared to 100  $\mu$ L  
93 cuvettes (figure 1d). IFN $\gamma$  knockout efficiency was similar for all experimental conditions and in both  
94 CD4 and CD8 T cells (figure 1d). As lower doses of Cas9 protein were equally effective, we chose 100  
95  $\mu$ g/mL in 100  $\mu$ L cuvettes as optimal concentration in all subsequent experiments. Analysis of additional  
96 parameters of cell viability: 7-AAD, Phosphatidyl Serine (PS) exposure and caspase activation confirmed  
97 the minimal loss of cell viability under these conditions (figure 1e). Non-T cells in the PBMC fraction  
98 were more sensitive to the T cell optimized protocol, as evident from increased cell death in the total  
99 PBMC fraction (figure 1f).

100

### 101 CRISPR/Cas9-mediated gene editing of ex vivo T cells does not overtly affect T cell function

102 Next, we tested whether our optimized protocol affected T cell function by evaluating cytokine  
103 production and proliferation of gene edited T cells. While release of IFN $\gamma$  into the extracellular space  
104 was markedly reduced in IFN $\gamma$  knockout T cells, no differences were observed in the release of other  
105 cytokines, such as TNF $\alpha$  and IL-2 (figure 2a, b, supplementary figure 1). Atypical induction of IL-4, IL-5  
106 or IL-10 were also not observed under these conditions (figure 2a, b). We also analyzed whether *ex vivo*  
107 gene engineered T cells required recovery following electroporation by activating T cells using anti-  
108 CD3/CD28 beads at 0, 30, 60, 120 and 240 minutes after RNP nucleofection, followed by 2 day culture  
109 and restimulation using PMA/ionomycin. Under all conditions, production of IFN $\gamma$ , but not TNF $\alpha$  or IL-2,  
110 was specifically abrogated (figure 2c, 2d). Accordingly, anti-CD3/CD28 bead- or PHA-based expansion of  
111 T cells directly following electroporation did not impair expansion capacity over a period of 14 days  
112 (figure 2e). Furthermore, gene-edited T cells that expanded over this period remained IFN $\gamma$ -negative,  
113 suggesting the optimized protocol did not negatively affect T cell fitness when compared with unedited

114 T cells (figure 2f and supplemental figure 1). We reasoned that the direct *ex vivo* gene editing, followed  
115 by immediate T cell activation, could even be leveraged to knockout genes critical for anti-CD3/CD28  
116 bead-based activation, as the steady-state protein levels in the absence of transcription are likely  
117 sufficient to drive signaling during the initial 24-48 hours of culture. To test this hypothesis, we disrupted  
118 expression of the T cell receptor (TCR $\alpha\beta$ ) complex. T cells were activated using anti-CD3/CD28 beads  
119 directly after RNP electroporation. Again, CRISPR Cas9/TCR $\alpha\beta$ -gRNA RNP complex electroporation  
120 resulted in high TCR $\alpha\beta$  knockout efficiency in both CD8 and CD4 T cells at 48h (figure 2g). As anticipated,  
121 TCR $\alpha\beta$  knockout T cells proliferated comparably to non-edited T cells over a period of 14 days (figure  
122 2h). As for IFN $\gamma$ , no detrimental effects of gene editing were observed and near-complete loss of TCR $\alpha\beta$   
123 was maintained at day 14 (figure 2i).

124

#### 125 CRISPR/Cas9-mediated gene editing of *ex vivo* T cells preferentially targets memory T cells

126 We next determined whether memory or naïve T cells were more amenable to CRISPR/Cas9-mediated  
127 gene editing in the *ex vivo* setting. PBMCs were subjected to TCR $\alpha\beta$ -targeting RNP electroporation,  
128 followed by 8-day culture with cytokines IL-2, IL-15 and/or IL-7 to support memory and naïve T cells,  
129 respectively. Cell viability was similar across all conditions (figure 3a). Percentages of memory CD8 T  
130 cells were similar between TCR $\alpha\beta$  knockout and TCR $\alpha\beta$ -expressing cells regardless of the cytokine  
131 cocktail used (figure 3b,c). Notably, there was a slight increase in the percentage of memory CD4 T cells  
132 after TCR $\alpha\beta$  knockout compared to the TCR $\alpha\beta$ -proficient cells, independent of cytokine stimulation  
133 (figure 3c).

134 To further explore this observation, we investigated the knockout efficiency within the memory and  
135 naïve T cell populations (figure 3d-i). The knockout efficiency of memory T cells varied between 60-  
136 85%, in CD8<sup>+</sup> T cells and between 70-95% in CD4<sup>+</sup> T cells (figure 3d,g). By contrast, the knockout  
137 efficiency for naïve T cells ranged between 35-80% in CD8 T cells and between 30-80% in CD4 T cells  
138 (figure 3e,h). In addition, the percentage of naïve TCR $\alpha\beta$  knockout CD8 T cells was higher when  
139 compared to naïve TCR $\alpha\beta$  knockout CD4 T cells (figure 3e,h). These findings collectively suggest that  
140 memory T cells, especially memory CD4 T cells, are slightly more susceptible to CRISPR/Cas9 gene  
141 editing than naïve T cells.

142

#### 143 CRISPR/Cas9-mediated gene editing is compatible with clinical antigen-specific T cell activation and 144 expansion assays

145 Finally, having established the high viability and efficacy of our approach, we evaluated whether our  
146 optimized protocol was compatible with best-practice assays for monitoring immune responses in  
147 clinical trial settings. We analyzed *ex vivo* peptide stimulation, as well as *in vitro* stimulation (IVS)  
148 assays. Using CEF peptides as model antigen, and T cell activation markers CD69 and CD137 as a

149 readout, we were able to demonstrate equivalent CEF-induced responses in gene-edited and  
150 untouched control cells for both the *ex vivo* assay (figure 4a, c) and following IVS (figure 4b, d). These  
151 responses were observed for IFN $\gamma$  knockouts, as well as for Cbl Proto-Oncogene B (CBLB) and Fas cell  
152 surface death receptor (Fas) gRNAs previously reported by others (figure 4a-d).

153

154

155 **DISCUSSION**

156 We describe a rapid, robust and flexible platform for CRISPR/Cas9-mediated gene editing in primary *ex*  
157 *vivo* human T cells. We have optimized efficiency, viability, as well as culture conditions to allow rapid  
158 and direct *ex vivo* modification of T cells for subsequent functional evaluation and/or expansion. Our  
159 platform is amenable to integration into clinically used pipelines for immune response evaluation using  
160 antigens of choice.

161 CRISPR/Cas9-mediated gene editing has become an attractive approach for modifying T cells,  
162 due to its simplicity, operability, low costs and capability of multiplex genome editing (9,11). However,  
163 to date, limited experience on the application of CRISPR/Cas9 electroporation in immune monitoring  
164 assays in clinical studies is available. The prerequisites for manipulating T cells in immunoassays are  
165 maintaining viability, antigen-specificity and function (4,7). In this study, we demonstrate for the first  
166 time that these prerequisites are not affected by CRISPR/Cas9 gene editing, thereby providing a proof-  
167 of-principle for the application of CRISPR/Cas9 in immune monitoring assays. In both CD8 and CD4 T  
168 cells, a highly efficient gene knock-out up to 90% was reached after a single transfection. Previously  
169 published literature, using CRISPR/cas9 RNP electroporation, reported efficiency rates of 20-90% with  
170 low efficiency rates in resting primary T cells (9,12–16). Moreover, we demonstrated that CRISPR/Cas9-  
171 edited cells could be maintained without stimulation in culture for up to 7 days, or supplemented with  
172 a diverse range of cytokines without comprising gene knockout efficacy. Activation of T cells directly, or  
173 at a later time-point of choosing did not negatively affect T cell function, expansion, nor did  
174 cryopreservation and subsequent restimulation. Finally, while the current work focused on knockout of  
175 genes, recent advances in non-homologous end joining (NHEJ)-mediated template incorporating using  
176 CRISPR/cas9 should be amenable to the current platform, allowing more complex *ex vivo* T cell  
177 engineering (12,14,17).

178 Advances in descriptive immune monitoring have expanded our understanding of anti-cancer  
179 immune responses. High-parameter flow, mass and spectral cytometry have allowed the simultaneous  
180 assessment of most immune cell populations *ex vivo* (18,19). Imaging using e.g. PET/SPECT allows non-  
181 invasive assessment of specific immune cells or immune checkpoints throughout the body, and  
182 transcriptomic approaches provide ever deeper dimensional assessment of gene expression, including  
183 spatial organization (20–22). By contrast, *ex vivo* functional assays have remained largely unchanged  
184 over the years, with peptide stimulation and intracellular flow cytometry, ELISPOT or ELISA used for  
185 functional readout on one or two hallmark activation markers (4,23). The platform we present here  
186 significantly expands the potential of these assays. By seamlessly integrating CRISPR/Cas9-mediated  
187 gene editing into *ex vivo* immune monitoring pipelines, it is possible to assess how T cells from clinically-

188 treated patients differentially depend on genes-of-interest, but also screen *ex vivo* for novel  
189 combination targets to further augment T cell activation (14,15). As demonstrated here, these targets  
190 need not be limited to cell surface targets accessible by antibody-based therapeutics (14,15). One  
191 interesting observation is that naïve CD4, but not CD8, T cells appear less sensitive to CRISPR/Cas9-  
192 mediated gene editing than their memory counterparts. Whether this is the result of the optimized  
193 electroporation protocol used, or an intrinsic feature of naïve CD4 T cells is currently unknown.  
194 Nevertheless, targeted genes of interest could be knocked out in ~60% of CD4 T cells, establishing our  
195 platform as an effective approach for studying both recall and *de novo* immune responses. An  
196 interesting approach would be to further combine our platform with recent advances in CRISPR/Cas9-  
197 mediated gene editing in monocyte-derived dendritic cells. This could allow reciprocal knockout of  
198 ligand-receptor interactions of particular interest for complex ligand-receptor pairs, such as CTLA-  
199 4/CD28 and CD80/CD86.

200           Taken together, our platform represents an advance on previous reports on CRISPR/Cas9-  
201 mediated gene editing and extends this approach to use in gold-standard clinically-used immune-  
202 monitoring pipelines.

203

204



## 205 MATERIALS AND METHODS

### 206 Peripheral Blood Mononuclear Cells

207 Peripheral blood mononuclear cells (PBMCs) were isolated from blood of healthy volunteers after  
208 written informed consent was obtained (Sanquin). For isolation, buffy coats were mixed at a 1:2 ratio  
209 with RPMI supplemented with 2,5% FCS, layered on a Ficoll-Paque gradient at a 1:2 volume ratio and  
210 centrifuged at 900 g for 20 minutes without brake. PBMC on the interface of the Ficoll-Paque and plasma  
211 layers were isolated by pipette (5-10 mL), supplemented with ice-cold PBS to a final volume of 50 mL  
212 and centrifuged at 560 g for 8 minutes without brake. PBMC pellets were pooled, supplemented with  
213 ice-cold PBS to a final volume of 50 mL and centrifuged at 350 g for 8 minutes without brake. After  
214 PBMCs were resuspended in 50 mL of ice-cold PBS, PBMCs were counted using the Bürker counting  
215 chamber and centrifuged at 350 g at 8 minutes without brake. Finally, PBMCs were resuspended in 1  
216 mL of freezing medium, consisting of 90% FCS and 10% DMSO, at a concentration of 10-100<sup>6</sup> cells per  
217 cryovial.

218

### 219 Cas9, tracrRNA and crRNA

220 Cas9 (Alt-R Cas 9 Nuclease V3), tracrRNA (Alt-R CRISPR-Cas9 tracrRNA) and the crRNAs (Alt-R CRISPR-Cas9  
221 crRNA) were synthesized by Integrated DNA Technologies (Coralville, USA). Each crRNA was  
222 reconstituted in nuclease free duplex buffer (Lonza) to a final concentration of 100 µM. See Table 1 for  
223 gRNAs and sequences. For TCRαβ: equal volumes of TRAC1 and TRBC were mixed before adding the  
224 RNP complex to the PBMCs, see RNP electroporation.

225

### 226 RNP electroporation

227 PBMCs were counted and resuspended in X-VIVO 15<sup>TM</sup> at densities as indicated. After optimization as  
228 indicated, the final protocol to prepare Cas9/gRNA RNP complexes was as follows: 150 pmol annealed  
229 gRNA per nucleofection condition was prepared by combining 1.5 µL tracrRNA with 1.5 µL crRNA. The  
230 mix was annealed by heating at 95°C for 5 minutes and slowly cooled down to room temperature for 10  
231 minutes. Next, 12 µL duplex buffer (Lonza, Basel, Switzerland) was added to get a final concentration  
232 150 pmol gRNA in 15 µL. To prepare a Cas9/gRNA RNP complex, 10 µg Cas9 (10 µg/ml) was added to  
233 the gRNA complex. This mixture was incubated for 10 minutes at room temperature. Finally, duplex  
234 buffer was added to the RNP complex to obtain a final volume of 20 µL.

235 For electroporation, PBMCs were centrifuged and washed once with PBS. Cells were  
236 resuspended in 100 µL nucleofection solution at densities as indicated. Nucleofection solution consisted  
237 of 82 µL P2 Primary Cell Nucleofector<sup>TM</sup> Solution (Lonza) and 18 µL Supplement 1 (Lonza, Basel,  
238 Switzerland) for 100 µL cuvettes and 16.4 µL P2 Primary Cell Nucleofector<sup>TM</sup> Solution and 3.6 µL  
239 Supplement 1 for 20 µL cuvettes. RNP complex was added to the PBMCs and incubated for 2 minutes

240 at room temperature. The PBMC/RNP mixture was transferred to a nucleofection cuvette, followed by  
241 electroporation of cells using a 4D-Nucleofector machine (Amaxa, program P2, pulse code EH100).  
242 PBMCs that did not undergo electroporation served as control and were centrifuged and washed with  
243 PBS.

244

#### 245 Intracellular cytokine staining

246 16 hours after electroporation, PBMCs were stimulated for 4 hours with PMA/Ionomycin (eBioscience  
247 stimulation cocktail) at 37° degrees. For intracellular staining of IFN $\gamma$ , tumor necrosis factor alpha  
248 (TNF $\alpha$ ), and interleukin-2 (IL-2), secretion of cytokines was blocked using golgiplug (protein transport  
249 inhibitor; BD 555029). After 4 hours, cells were stained with Zombie Aqua viability dye according to  
250 manufacturer's protocol and washed with PBS supplemented with 5% FCS. Next, cells were fixed and  
251 permeabilized (CEL FIXATIE & PERMEABILISATIE KIT, GAS-002, Nordic-Mubio) and stained with surface  
252 markers CD3, CD8, CD4, and intracellular markers IFN $\gamma$  and IL-2 for flow cytometer analysis. For the  
253 TCR $\alpha\beta$  knockout experiments, only cell surface staining with TCR $\alpha\beta$ , CD3, CD8 and CD4 antibodies was  
254 performed. See supplementary table 2 for characteristics of the antibodies. For fixation and  
255 permeabilization cells were incubated with 100  $\mu$ L/well of reagent A (fix) for 15 minutes at room  
256 temperature. Next, cells were washed with PBS and incubated with a mixture of reagent B (perm) and  
257 antibodies for 15 minutes at room temperature. In total 100  $\mu$ L of the mixture reagent B plus antibodies  
258 was added per well. After incubation, cells were washed twice, centrifuged and resuspended in flow  
259 cytometry buffer (PBS + 2% FCS).

260 Intracellular staining of IFN $\gamma$ , TNF $\alpha$  and IL-2 was also performed on engineered T cells activated  
261 with anti-CD3/CD28 beads (Thermofisher, Cat. 11131D) at 0, 30, 60, 120 and 240 minutes after RNP  
262 nucleofection, followed by 2 day culture and restimulation using PMA/ionomycin.

263

#### 264 Apoptosis assay

265 Apoptosis was assessed 24 hours after CRISPR/Cas9-mediated gene editing. PBMCs were counted,  
266 centrifuged and resuspended in X-VIVO 15™ at a density of 1-2x10<sup>6</sup> cells/mL. Subsequently, 1  $\mu$ L Violet  
267 live Caspase probe per 0.5 mL of cell suspension was added and cells were incubated for 45 minutes at  
268 37°C. After washing, cells were resuspended in fresh medium and incubated for an additional 30  
269 minutes at 37°C while protected from light. Afterwards, CD8 and CD3 antibodies were added and cells  
270 were incubated for 30 minutes at room temperature. Cells were washed twice with cold PBS and  
271 resuspended in 1x Annexin V Binding Buffer at a final concentration of 1x10<sup>6</sup> cells/mL. 1x10<sup>5</sup> cells were  
272 incubated with 5  $\mu$ L of Annexin V and 5  $\mu$ L of 7-Aminoactinomycin D Invitrogen™ (7-AAD) for 15 minutes  
273 at room temperature in the dark. Cells were analyzed within 1 hour using the BD FACSVerser flow  
274 cytometer (BD Biosciences).

275 Cytokine bead array

276 One day after electroporation ( $10 \times 10^6$  cells in 2 mL, 1 mL per well), gene-edited and control PBMCs  
277 were incubated with PMA/ionomycin (eBioscience stimulation cocktail) for 4 hours at 37°C.  
278 Subsequently, supernatant was collected, and stored at -80°C.

279 The human Th1/Th2 Cytokine Assay (BD™ Cytometric Bead Array (CBA) Human Th1/Th2 Cytokine Kit II)  
280 was used to quantitatively measure cytokine production according to the manufacturer's protocol. In  
281 brief, supernatant was thawed and 50 µL was used for the cytokine bead array. Samples and standards  
282 were incubated with the capture beads for 3 hours at room temperature, while protected from light  
283 (Supplementary data, supplementary table 2). After incubation, assay tubes were washed, centrifuged  
284 and resuspended before flow cytometer analysis.

285

286 T cell expansion assay

287 PBMCs were plated at a density of  $5 \times 10^6$ /ml in a 24 wells plate. Expansion of gene-edited PBMCs was  
288 tested by stimulation with CD3/CD28 beads (20 µL per well,  $5 \times 10^6$  cells per well) or phytohemagglutinin  
289 (L1668 Sigma)(PHA, 10 µg/mL). IL-2 (50 IU/mL) was added to both stimulating conditions. Stimulation  
290 was done directly after electroporation. Plates were incubated at 37°C and cells were counted and at  
291 day 7, 10 and 14. Cell density was maintained around  $1 \times 10^6$  cells/mL and medium, IL-2 and/or PHA was  
292 refreshed at day 7, and 10.

293

294 Ex vivo T cell stimulation

295 PBMCs were resuspended in 500 µL culture medium (X-VIVO 15™ with 10% human serum) and plated  
296 in 100 µL/well of 96-well round bottom plates (ThermoFisher) at a density of  $1 \times 10^6$ /ml. Cells were *ex*  
297 *vivo* stimulated either with viral peptides consisting of a pool of 23 different peptides originating from  
298 Cytomegalovirus, Epstein-Barr virus and influenza virus peptides (CEF) or with interleukin 7 (IL-7) and  
299 interleukin 15 (IL-15). CEF was synthesized by JPT Peptide Technology (Berlin, Germany). Recombinant  
300 human IL-7 (Asp26-His177, size 10 µg) and recombinant human IL-15 (amino acids Asn49-Ser162, size  
301 10 µg) were purchased from Biolegend.

302 For *ex vivo* stimulation with CEF, cells were activated one day after electroporation by  
303 incubation with CEF peptides at a concentration of 1 µg/ml at 37°C. For *ex vivo* stimulation with IL-7 and  
304 IL-15, cells were activated by incubation with IL-7 and IL-15 at a concentration of 25 ng/ml at 37°C at  
305 day 8. After 16-26 hours of incubation with CEF or IL-7 and IL-15, cells were stained for T cell phenotype  
306 with CD3, CD8 and CD14 and for T cell activation with CD69 and CD137, see supplementary table 2.

307

308 In vitro T cell stimulation (IVS)

309 PBMCs were plated in 2 mL culture medium per well per CRISPR condition of 24-wells plates at a density  
310 of  $5 \times 10^6$ /ml. Culture medium composed of X-VIVO 15™ enriched with 10% human serum, 1%  
311 penicillin/streptomycin (P/S), 1% L-glutamine (L-glu) and IL-2 (20 IU/ml). PBMCs were stimulated with  
312 CEF for 13 days. A concentration of 1 µg/mL CEF was used. Medium was changed at day 4, 6, 8 and 11,  
313 according to the harmonization protocol of short-term *in vitro* culture for expansion of antigen-specific  
314 CD8+ T cells (4). At day 13, cells were re-stimulated with CEF at a concentration of 1 µg/mL overnight at  
315 37°C and 5% CO<sub>2</sub>, while medium served as a negative control and PHA (L1668 Sigma) at 1 µg/mL as  
316 positive control. After 16-26 hours cells were stained for phenotype with CD3 and CD8 and for activation  
317 with CD69 and CD137, see supplementary table 2 for characteristics of the antibodies.

318

### 319 Memory T cells assay

320 PBMCs were resuspended in 800 µL culture medium (X-VIVO 15™ with 10% human serum) and plated  
321 in 100 µL/well of 96-well round bottom plates (Thermofisher) at a density of  $0,625 \times 10^6$ /mL. PBMCs were  
322 stimulated with IL-2, IL-7 and/or IL-15 at a concentration of 25 ng/mL or left untreated as indicated.  
323 Cells were cultured for 7 days. At day 8, cells were stained for T cell memory phenotype with CD4, CD8,  
324 CD45 and TCRα/β, see supplementary table 2 for characteristics of the antibodies.

325

326 **Declaration of Interest statements:**

327 **FF** Outside the submitted work, dr. Foijer reports grants from the Dutch Cancer Society (KWF)

328 **HWN**, Outside the submitted work, prof. Nijman reports grants from the Dutch Cancer Society (KWF),  
329 grants from the European Research Council (ERC), grants from Health Holland, non-financial support  
330 from AIMM Therapeutics, grants from Immunicum, non-financial support from BioNTech, non-financial  
331 support from Surflay, grants and shares and non-financial support from Vicinivax; In addition, prof.  
332 Nijman has grants and non-financial support from Aduro Biotech, in part relating to a patent for  
333 Antibodies targeting CD103 (de Bruyn et al. No. 62/704,258).

334 **MB**, Outside the submitted work, dr. de Bruyn reports grants from the Dutch Cancer Society (KWF),  
335 grants from the European Research Council (ERC), grants from Health Holland, grants from Immunicum,  
336 non-financial support from BioNTech, non-financial support from Surflay, grants and non-financial  
337 support from Vicinivax; non-financial support from AIMM therapeutics; In addition, dr. de Bruyn has  
338 grants and non-financial support from Aduro Biotech, in part relating to a patent for Antibodies targeting  
339 CD103 (de Bruyn et al. No. 62/704,258).

340 There are no conflicts of interest to disclose for the remaining authors.

341

342 REFERENCES

- 343 1. Liu D, Zhao X, Tang A, Xu X, Liu S, Zha L, et al. CRISPR screen in mechanism and target discovery  
344 for cancer immunotherapy. *Biochim Biophys Acta - Rev Cancer* [Internet].  
345 2020;1874(1):188378. Available from: <https://doi.org/10.1016/j.bbcan.2020.188378>
- 346 2. Henriksson J, Chen X, Gomes T, Ullah U, Meyer KB, Miragaia R, et al. Genome-wide CRISPR  
347 Screens in T Helper Cells Reveal Pervasive Crosstalk between Activation and Differentiation.  
348 *Cell*. 2019;176(4):882-896.e18.
- 349 3. Shifrut E, Carnevale J, Tobin V, Roth TL, Woo JM, Bui CT, et al. Genome-wide CRISPR Screens in  
350 Primary Human T Cells Reveal Key Regulators of Immune Function. *Cell* [Internet].  
351 2018;175(7):1958-1971.e15. Available from: <https://doi.org/10.1016/j.cell.2018.10.024>
- 352 4. Chudley L, McCann KJ, Coleman A, Cazaly AM, Bidmon N, Britten CM, et al. Harmonisation of  
353 short-term in vitro culture for the expansion of antigen-specific CD8+ T cells with detection by  
354 ELISPOT and HLA-multimer staining. *Cancer Immunol Immunother*. 2014;63(11):1199–211.
- 355 5. Dey S, Kamil Reza K, Wuethrich A, Korbie D, Ibn Sina AA, Trau M. Tracking antigen specific T-  
356 cells: Technological advancement and limitations. *Biotechnol Adv*. 2019;37(1):145–53.
- 357 6. Santegoets SJAM, Welters MJM, van der Burg SH. Monitoring of the immune dysfunction in  
358 cancer patients. *Vaccines*. 2016;4(3):1–23.
- 359 7. Lin Y, Gallardo HF, Ku GY, Li H, Manukian G, Rasalan TS, et al. Optimization and validation of a  
360 robust human T-cell culture method for monitoring phenotypic and polyfunctional antigen-  
361 specific CD4 and CD8 T-cell responses. *Cytotherapy*. 2009;11(7):912–22.
- 362 8. Oh SA, Seki A, Rutz S. Ribonucleoprotein Transfection for CRISPR/Cas9-Mediated Gene  
363 Knockout in Primary T Cells. *Curr Protoc Immunol*. 2019;124(1):1–18.
- 364 9. Seki A, Rutz S. Optimized RNP transfection for highly efficient CRISPR/Cas9-mediated gene  
365 knockout in primary T cells. *J Exp Med*. 2018;215(3):985–97.
- 366 10. Roth TL, Puig-Saus C, Yu R, Shifrut E, Carnevale J, Li PJ, et al. Reprogramming human T cell  
367 function and specificity with non-viral genome targeting. *Nature* [Internet].  
368 2018;559(7714):405–9. Available from: <http://dx.doi.org/10.1038/s41586-018-0326-5>
- 369 11. Sander JD, Joung JK. CRISPR-Cas systems for genome editing, regulation and targeting. *Nat*  
370 *Biotechnol*. 2014;32(4):347–55.

- 371 12. Hendel A, Bak RO, Clark JT, Kennedy AB, Ryan DE, Roy S, et al. Chemically modified guide RNAs  
372 enhance CRISPR-Cas genome editing in human primary cells. *Nat Biotechnol.* 2015;33(9):985–  
373 9.
- 374 13. Mandal PK, Ferreira LMR, Collins R, Meissner TB, Boutwell CL, Friesen M, et al. Efficient  
375 ablation of genes in human hematopoietic stem and effector cells using CRISPR/Cas9. *Cell Stem*  
376 *Cell* [Internet]. 2014;15(5):643–52. Available from:  
377 <http://dx.doi.org/10.1016/j.stem.2014.10.004>
- 378 14. Schumann K, Lin S, Boyer E, Simeonov DR, Subramaniam M, Gate RE, et al. Generation of  
379 knock-in primary human T cells using Cas9 ribonucleoproteins. *Proc Natl Acad Sci U S A.*  
380 2015;112(33):10437–42.
- 381 15. Rupp LJ, Schumann K, Roybal KT, Gate RE, Ye CJ, Lim WA, et al. CRISPR/Cas9-mediated PD-1  
382 disruption enhances anti-Tumor efficacy of human chimeric antigen receptor T cells. *Sci Rep.*  
383 2017;7(1):1–10.
- 384 16. Su S, Hu B, Shao J, Shen B, Du J, Du Y, et al. CRISPR-Cas9 mediated efficient PD-1 disruption on  
385 human primary T cells from cancer patients. *Sci Rep.* 2016;6:1–13.
- 386 17. Banan M. Recent advances in CRISPR/Cas9-mediated knock-ins in mammalian cells. *J*  
387 *Biotechnol* [Internet]. 2020;308(August 2019):1–9. Available from:  
388 <https://doi.org/10.1016/j.jbiotec.2019.11.010>
- 389 18. Pitoiset F, Cassard L, El Soufi K, Boselli L, Grivel J, Roux A, et al. Deep phenotyping of immune  
390 cell populations by optimized and standardized flow cytometry analyses. *Cytom Part A.*  
391 2018;93(8):793–802.
- 392 19. Abdelaal T, van Unen V, Höllt T, Koning F, Reinders MJT, Mahfouz A. Predicting Cell Populations  
393 in Single Cell Mass Cytometry Data. *Cytom Part A.* 2019;95(7):769–81.
- 394 20. van de Donk PP, de Ruijter LK, Lub-De Hooge MN, Brouwers AH, van der Wekken AJ, Oosting  
395 SF, et al. Molecular imaging biomarkers for immune checkpoint inhibitor therapy. *Theranostics.*  
396 2020;10(4):1708–18.
- 397 21. Zheng C, Zheng L, Yoo JK, Guo H, Zhang Y, Guo X, et al. Landscape of Infiltrating T Cells in Liver  
398 Cancer Revealed by Single-Cell Sequencing. *Cell* [Internet]. 2017;169(7):1342-1356.e16.  
399 Available from: <http://dx.doi.org/10.1016/j.cell.2017.05.035>
- 400 22. Azizi E, Carr AJ, Plitas G, Cornish AE, Konopacki C, Prabhakaran S, et al. Single-Cell Map of  
401 Diverse Immune Phenotypes in the Breast Tumor Microenvironment. *Cell* [Internet].

402 2018;174(5):1293-1308.e36. Available from: <https://doi.org/10.1016/j.cell.2018.05.060>

403 23. Letsch A, Scheibenbogen C. Quantification and characterization of specific T-cells by antigen-  
404 specific cytokine production using ELISPOT assay or intracellular cytokine staining. *Methods*.  
405 2003;31(2):143–9.

406



407 SUPPLEMENTARY TABLES

408

409 Supplementary table 1

| gRNA         | Sequence                   |
|--------------|----------------------------|
| IFN $\gamma$ | AAA GAG TGT GGA GAC CAT CA |
| CBLB         | TGCACAGAACTATCGTACCA       |
| Fas          | GAGGGTCCAGATGCCAGCA        |
| TCR $\alpha$ | TGTGCTAGACATGAGGTCTA       |
| TCR $\beta$  | GGAGAATGACGAGTGGACCC       |

410

411

412 Supplementary table 2

413

| Antibody           | Color          | Cat No        | Supplier                      | Experiment                                                                                                      |
|--------------------|----------------|---------------|-------------------------------|-----------------------------------------------------------------------------------------------------------------|
| CD3                | APC-eFluor 780 | 47-0038-42    | eBioscience™,<br>ThermoFisher | <i>Ex vivo</i> and <i>in vitro</i> T cell stimulation                                                           |
| CD3                | PE             | 12-0038-41/42 | eBioscience™,<br>ThermoFisher | Apoptosis assay                                                                                                 |
| CD3                | FITC           | 555332        | BD                            | Intracellular cytokine staining                                                                                 |
| CD4                | PE             | 12-0048-42    | eBioscience™,<br>ThermoFisher | Intracellular cytokine staining<br>Memory T cell assay                                                          |
| CD8                | BV421          | 562428        | eBioscience™,<br>ThermoFisher | Intracellular cytokine staining<br><i>Ex vivo</i> and <i>in vitro</i> T cell stimulation<br>Memory T cell assay |
| CD8                | APC-eFluor 780 | 47-0088-42    | eBioscience™,<br>ThermoFisher | Apoptosis assay<br>Intracellular cytokine staining                                                              |
| CD45RA             | Pe-Cy7         | 25-0458-41    | eBioscience™,<br>ThermoFisher | Memory T cell assay                                                                                             |
| CD69               | FITC           | 11-0699-41    | eBioscience™,<br>ThermoFisher | <i>Ex vivo</i> and <i>in vitro</i> T cell stimulation                                                           |
| CD137              | PE             | 12-1379-42    | eBioscience™,<br>ThermoFisher | <i>Ex vivo</i> and <i>in vitro</i> T cell stimulation                                                           |
| TCR $\alpha/\beta$ | APC            | 17-9986-41    | eBioscience™,<br>ThermoFisher | Memory T cell assay<br>Intracellular cytokine staining                                                          |
| IFN $\gamma$       | PerCP-Cy5.5    | 45-7319-42    | eBioscience™,<br>ThermoFisher | Intracellular cytokine staining                                                                                 |
| TNF $\alpha$       | APC            | 17-7349-82    | eBioscience™,<br>ThermoFisher | Intracellular cytokine staining                                                                                 |
| IL-2               | PE-Cy7         | 25-7029-42    | eBioscience™,<br>ThermoFisher | Intracellular cytokine staining                                                                                 |

414

415

416

417 **Supplementary table 3**

418

| Tube label | Concentration (pg/mL) | Cytokine Standard dilution                |
|------------|-----------------------|-------------------------------------------|
| 1          | 0 (negative control)  | No standard dilution (Assay Diluent only) |
| 2          | 20                    | 1:256                                     |
| 3          | 40                    | 1:128                                     |
| 4          | 80                    | 1:64                                      |
| 5          | 156                   | 1:32                                      |
| 6          | 312,5                 | 1:16                                      |
| 7          | 625                   | 1:8                                       |
| 8          | 1250                  | 1:4                                       |
| 9          | 2500                  | 1:2                                       |
| 10         | 5000                  | Top Standard                              |

419

420

421 **FIGURE DESCRIPTIONS**

422 **Figure 1. CRISPR/Cas9 electroporation *ex vivo* T cells does not affect T cell viability**

423 Electroporation of PBMCs with Cas9/IFN $\gamma$  gRNA RNP complexes results in almost complete abrogation  
424 of IFN $\gamma$  expression in both CD8 and CD4 T cells. 16 hours after electroporation, PBMCs were  
425 stimulated for 4 hours with PMA/Ionomycin. (A, C) Representative flow cytometry contour plot  
426 showing the expression of IFN $\gamma$  production in CD8 T cells. (B) Scatterplots demonstrating the viability  
427 of PBMCs after electroporation alone, with Cas9/gRNA complexes and/or crRNA alone. Viability was  
428 measured using amine reactive-dye. (D) Effect of different cuvette sizes (100 and 20 $\mu$ L) and different  
429 Cas9 protein concentrations (0, 100, 250 en 500  $\mu$ g/ml) on cell viability. (E) Analysis of additional  
430 parameters of cell viability was performed using 7-AAD, Phosphatidyl Serine (PS) exposure and  
431 caspase activation in CD8 and CD4 T cells(E) and in the total PBMC fraction(F).  
432 Blue dots represent unstimulated PBMCs; orange dots represent PBMCs stimulated with  
433 PMA/ionomycin for 4 hours; green dots represent all PBMCs; in e, middle scatterpot, blue dots  
434 represent CD8 T cells and orange dots CD4 T cells.  
435

436 **Figure 2. CRISPR/Cas9-mediated gene editing of *ex vivo* T cells does not affect T cell function**

437 IFN $\gamma$ , TNF $\alpha$ , IL-2, IL-4, IL-5 and IL-10 release was evaluated using a cytokine bead array kit. (A,B)  
438 Electroporation with Cas9/IFN $\gamma$  gRNA RNP complexes results in reduced IFN $\gamma$  release whereas no  
439 differences are observed in the release of TNF $\alpha$  and IL-2, 2 days after electroporation. Atypical  
440 induction of IL-4, IL-5 or IL-10 are also not observed. (C) t-SNE plots showing the reduced IFN $\gamma$  release  
441 after stimulation with beads at t=0 and t=4 hours after electroporation. (D) IFN $\gamma$ , TNF $\alpha$  and IL-2  
442 cytokine-producing CD8 T cells after activation with anti-CD3/CD28 beads at 0, 30, 60, 120 and 240  
443 minutes after RNP nucleofection, followed by 2 day culture and restimulation using PMA/ionomycin.  
444 (E) Scatterplot showing the anti-CD3/CD28 bead- or PHA-based expansion of T cells directly following  
445 electroporation over 14 days. (F) IFN $\gamma$  and IL-2 production of 14 days expanded gene-edited CD8 T  
446 cells. (G) Flow cytometry contour plot showing the TCR $\alpha\beta$  knockout in CD8 and CD4 T cells 48 hours  
447 after electroporation (G). (H) Expansion capacity of anti-CD3/CD28 activated TCR $\alpha\beta$  knockout cells  
448 over 14 days. (I) Flow cytometry contour plot left) and scatterplot (right) showing the TCR $\alpha\beta$  knockout  
449 in CD8 and CD4 T cells after 14 days.

450

451 **Figure 3. CRISPR/Cas9 gene editing preferentially targets memory T cells.**

452 Gene editing of TCR $\alpha\beta$ , IFN $\gamma$ , CBLB or FAS in PBMCs. (A) Viability of CD8 versus CD4 TCR $\alpha\beta$  knockout T  
453 cells after *in vitro* stimulation with IL-2, IL-15 and/or IL-7 for eight days. (B) Percentages of CD8 and (C)  
454 CD4 memory T cells within TCR $\alpha\beta$  knockout T cells compared to TCR $\alpha\beta$ -proficient cells after co-

455 culturing with IL-2, IL-15 and/or IL-7 for eight days. (D) Percentages of CD8 memory and (E) CD8 naïve  
456 T cells expressing TCR $\alpha\beta$  eight days after gene editing. (F) Gene editing efficiency of CD8 memory T  
457 cells compared to CD8 naïve T cells. (G) Percentages of CD4 memory and (H) CD4 naïve T cells  
458 expressing TCR $\alpha\beta$  eight days after gene editing of the TCR $\alpha\beta$  receptor. (I) Gene editing efficiency of  
459 CD4 memory T cells compared to CD4 naïve T cells. Culture conditions as indicated.

460

461 **Figure 4. CRISPR/Cas9 editing does not influence the antigen-specificity of T cells.**

462 Gene editing of IFN $\gamma$ , CBLB or FAS in PBMCs. (A) Representative flow cytometry contour plots showing  
463 the expression of T cell activation markers CD69 and CD137 after *ex vivo* and (B) post-IVS stimulation  
464 with CEF. (C) Scatterplot representing the percentage of CD8 T cells expressing both activation  
465 markers CD137 and CD69 within variable CRISPR gene editing conditions and untouched control cells  
466 after *ex vivo* stimulation at day 2 and (D) post-IVS stimulation with and without CEF peptides at day 13.  
467 Blue dots represent PBMCs not stimulated with CEF peptides and orange dots PBMCs stimulated with  
468 CEF.

469

470 **Supplementary figure 1. CRISPR/Cas9-mediated gene editing of *ex vivo* T cells does not affect T cell**  
471 **function.**

472 Scatterplots representing the IFN $\gamma$ -, IL-2, and TNF $\alpha$  producing CD8 and CD4 T cells after activation with  
473 anti-CD3/CD28 beads, or PHA, 14 days after expansion (relates to figure 2f).

474

475 **Supplementary figure 2. Gating strategy.**

476 Scatterplots representative for the gating strategy used throughout the manuscript. The depicted  
477 scatterplots show gene edited PBMCs after CBLB knockout and IVS stimulation with CEF. Cell  
478 populations are depicted above the FACS images and the gated population are depicted below.

479

480

481

482

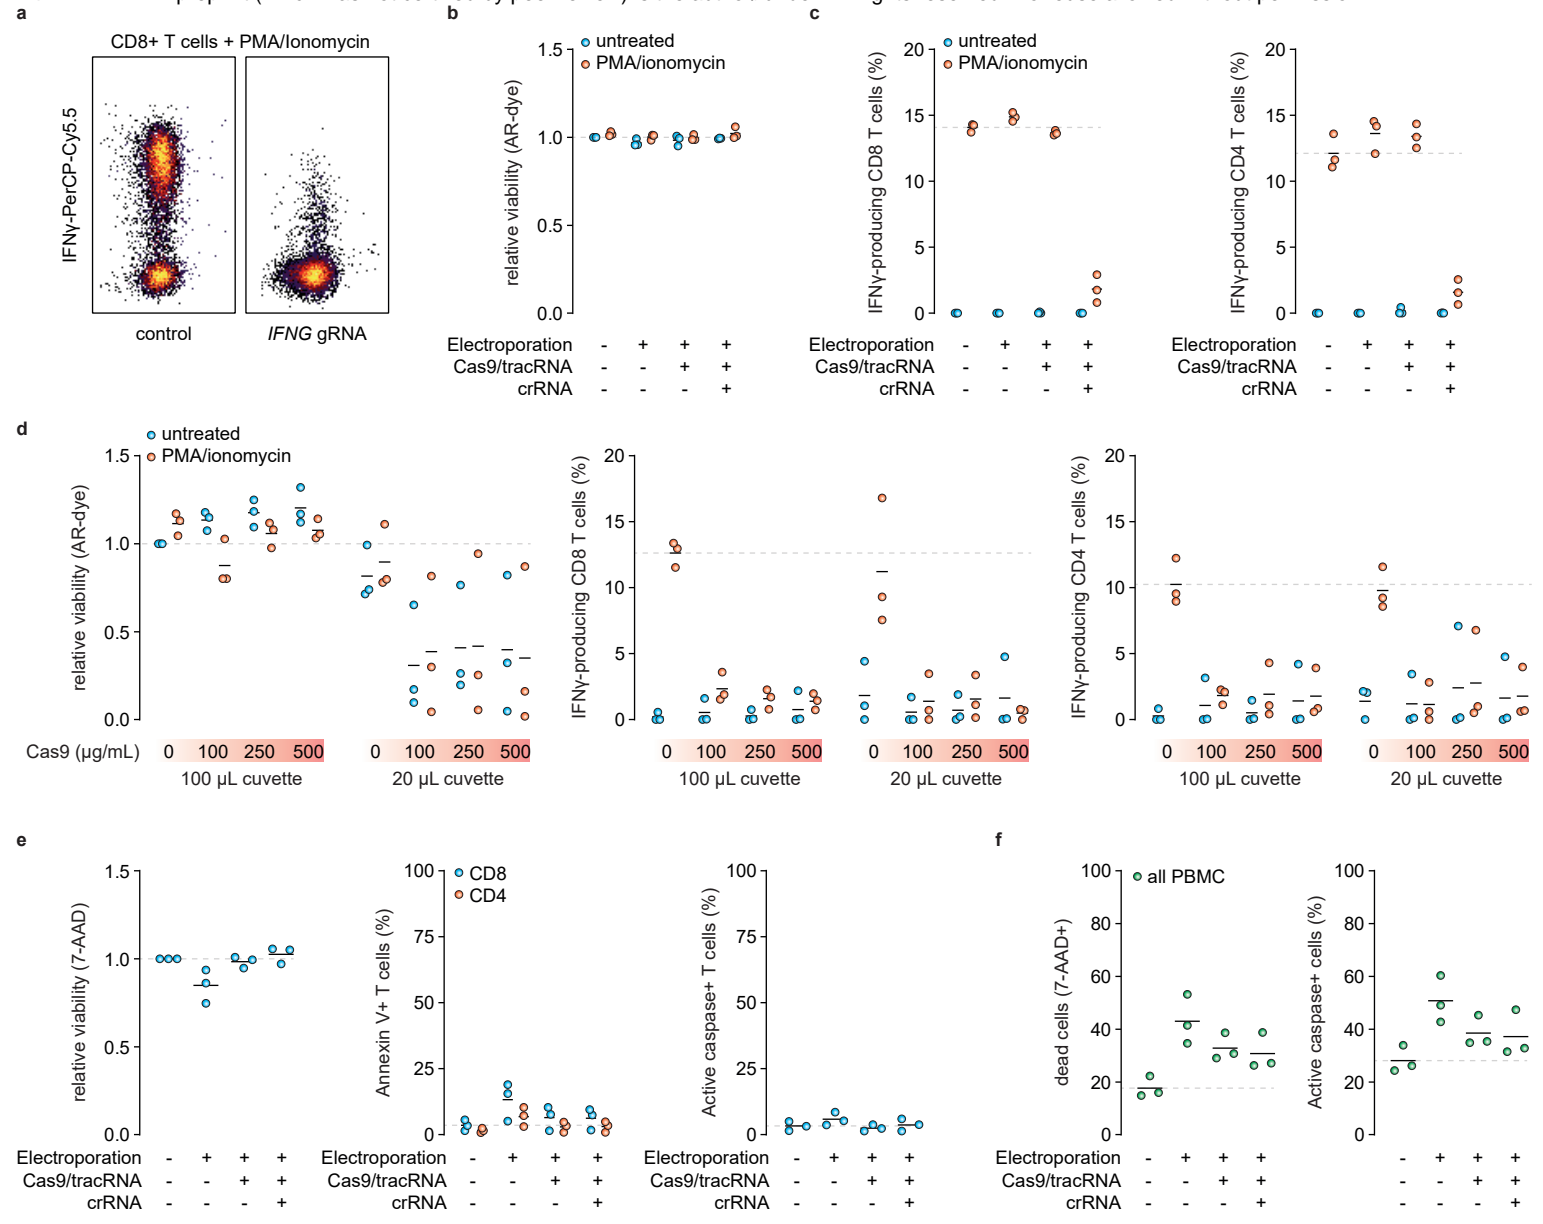

**Figure 2. CRISPR/Cas9-mediated gene editing of ex vivo T cells does not affect T cell function**

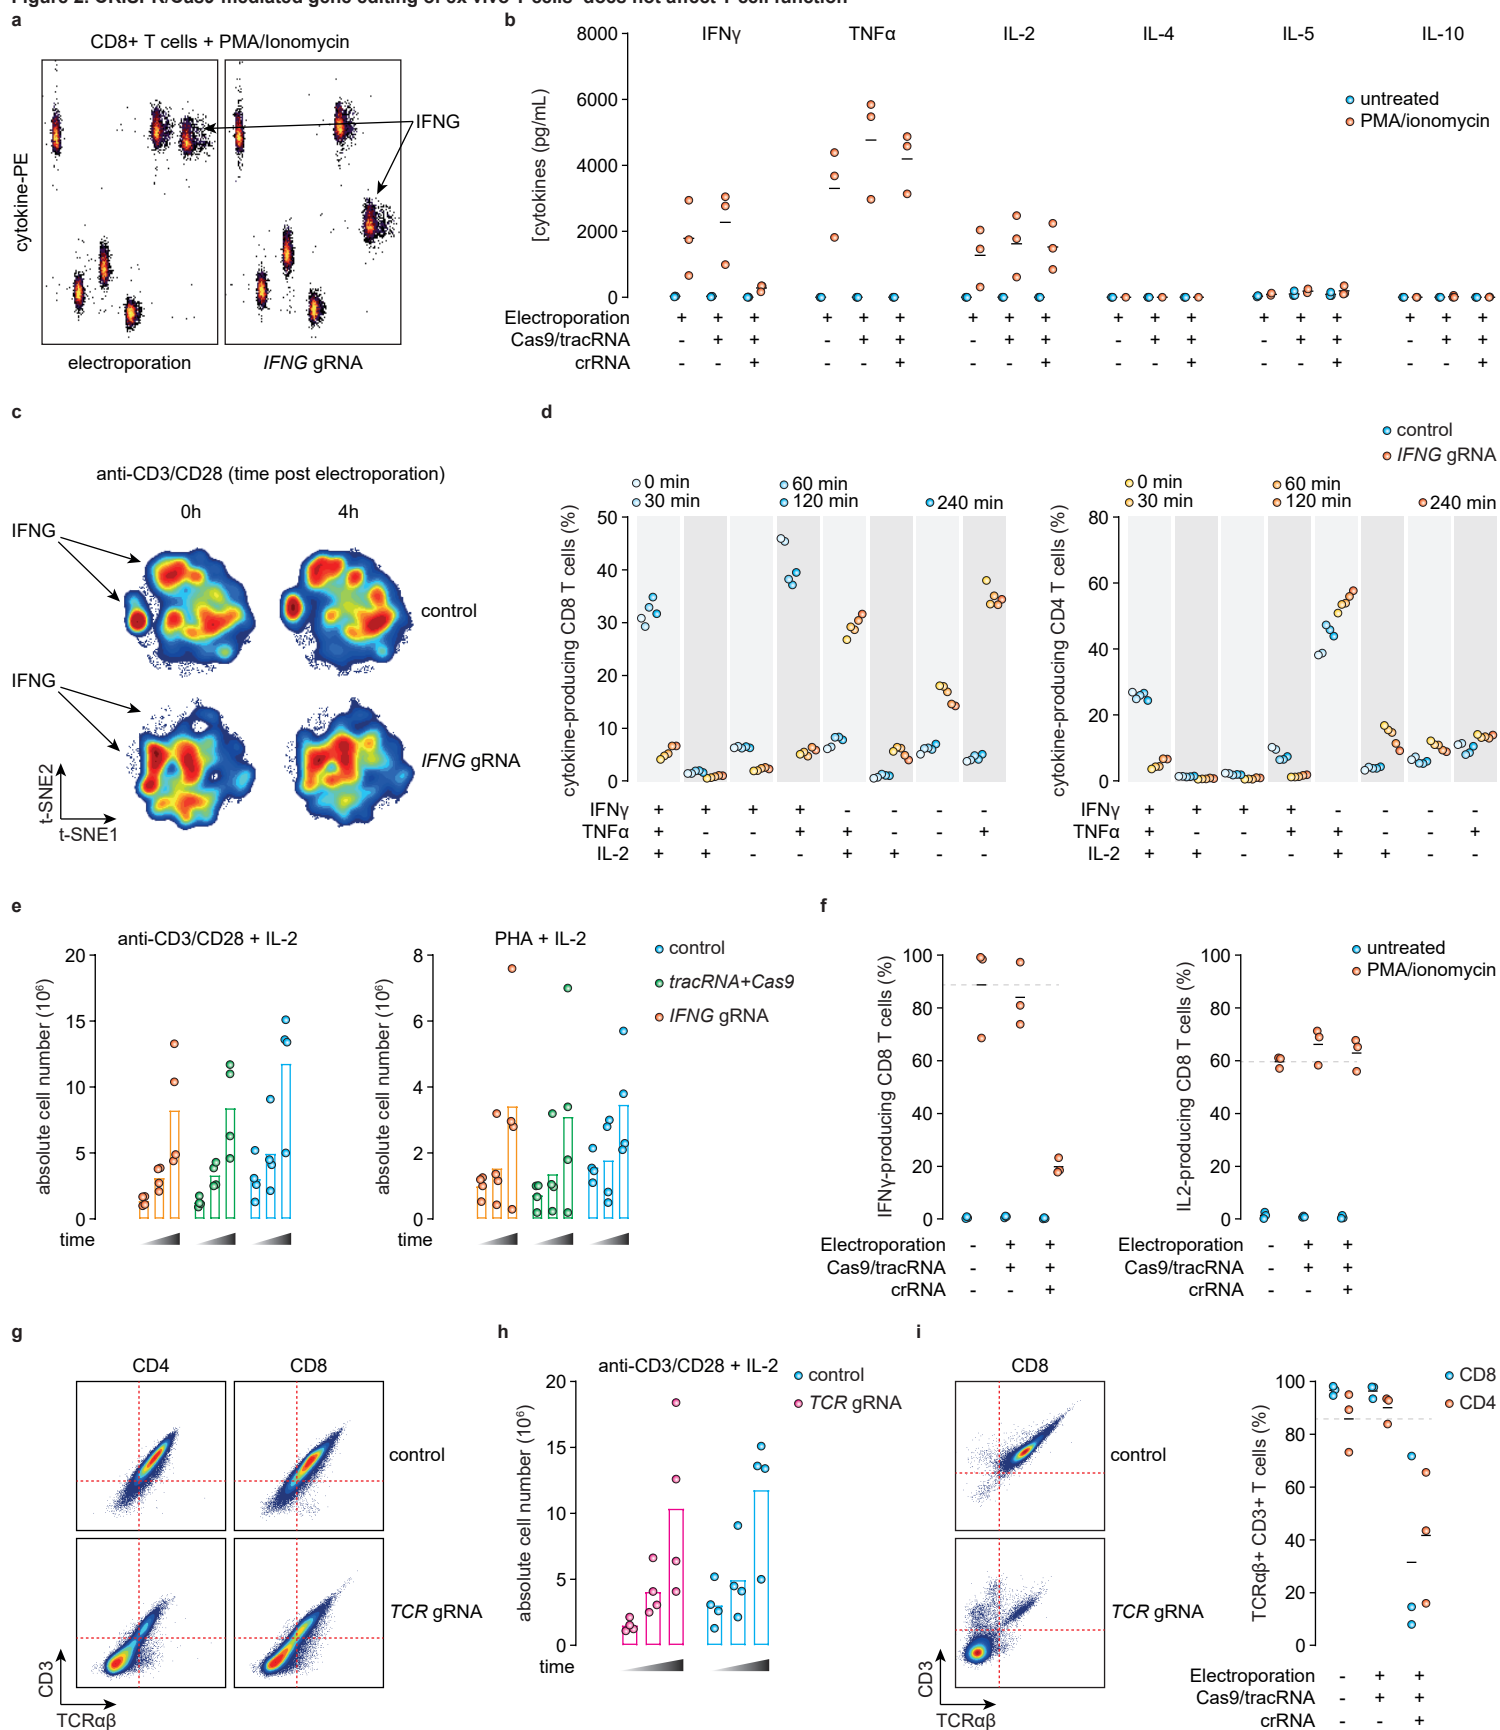

**Figure 3. CRISPR-Cas9 gene editing preferentially targets memory T cells**

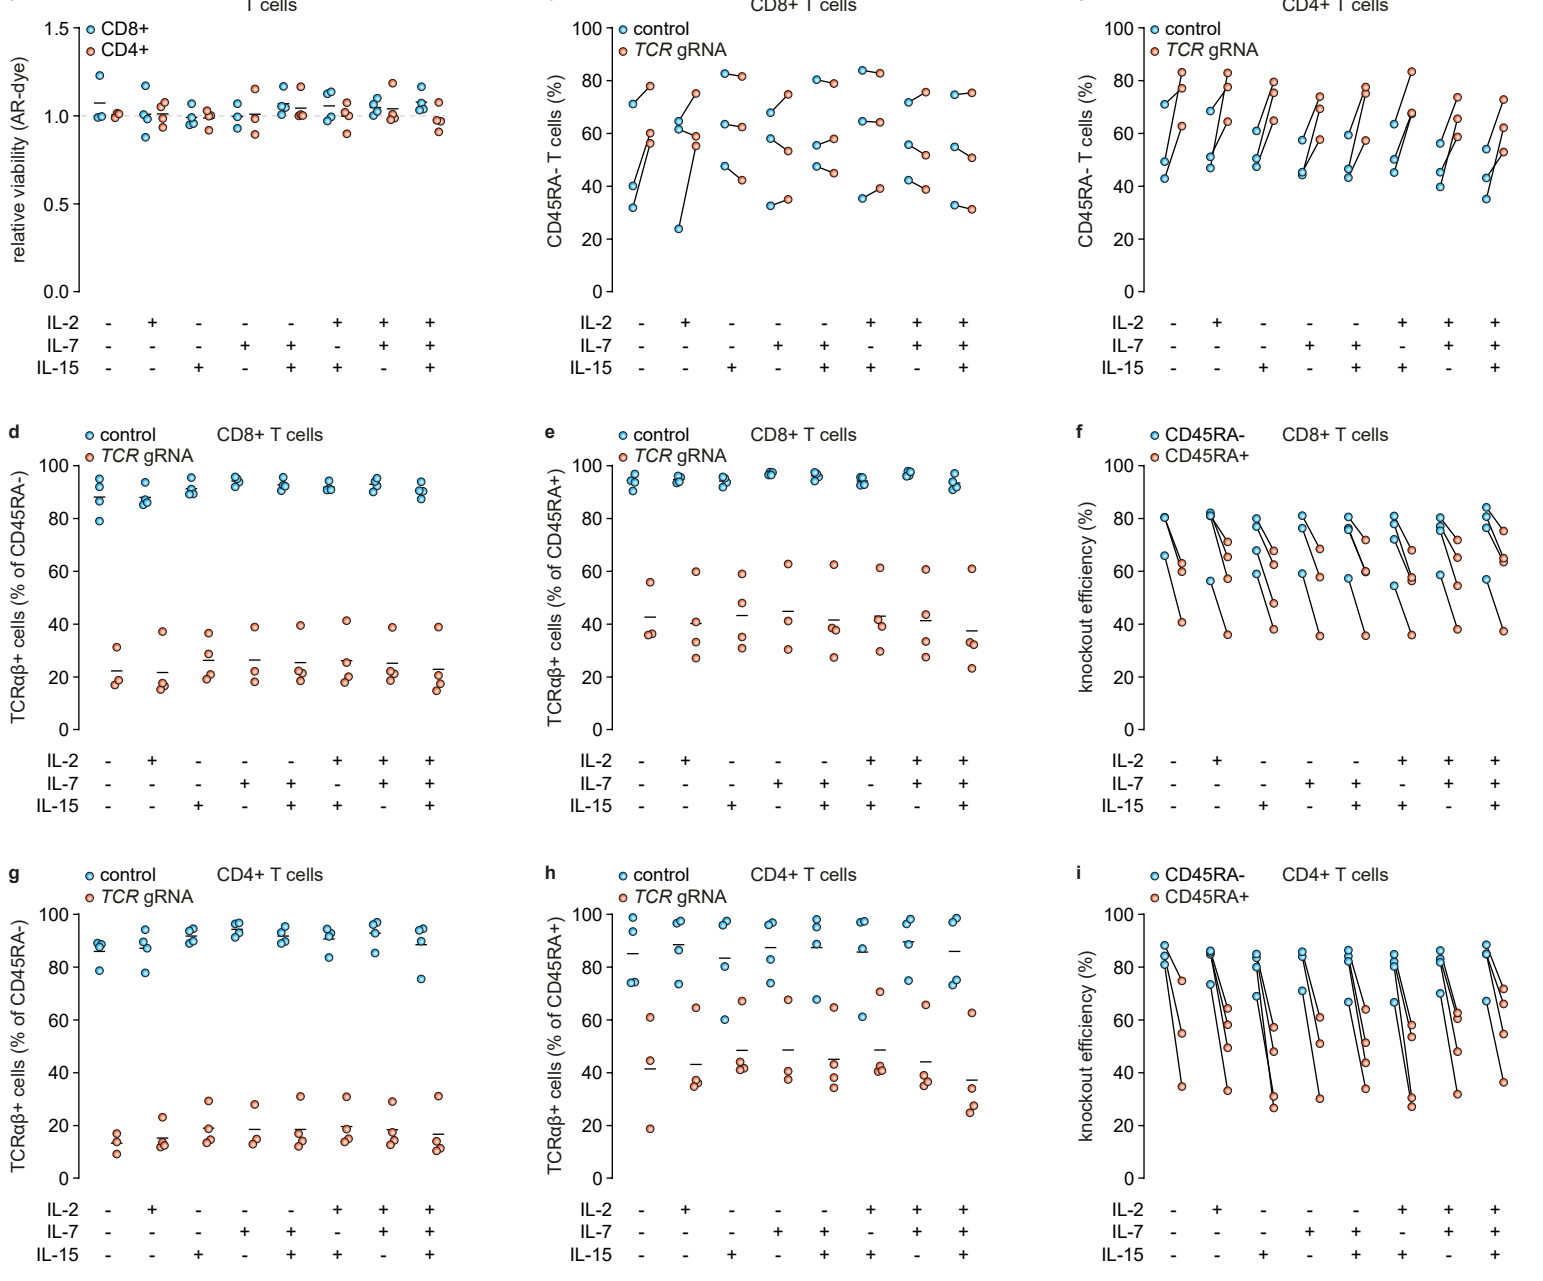

Figure 4. CRISPR/Cas9 editing does not influence the antigen-specificity of T cells

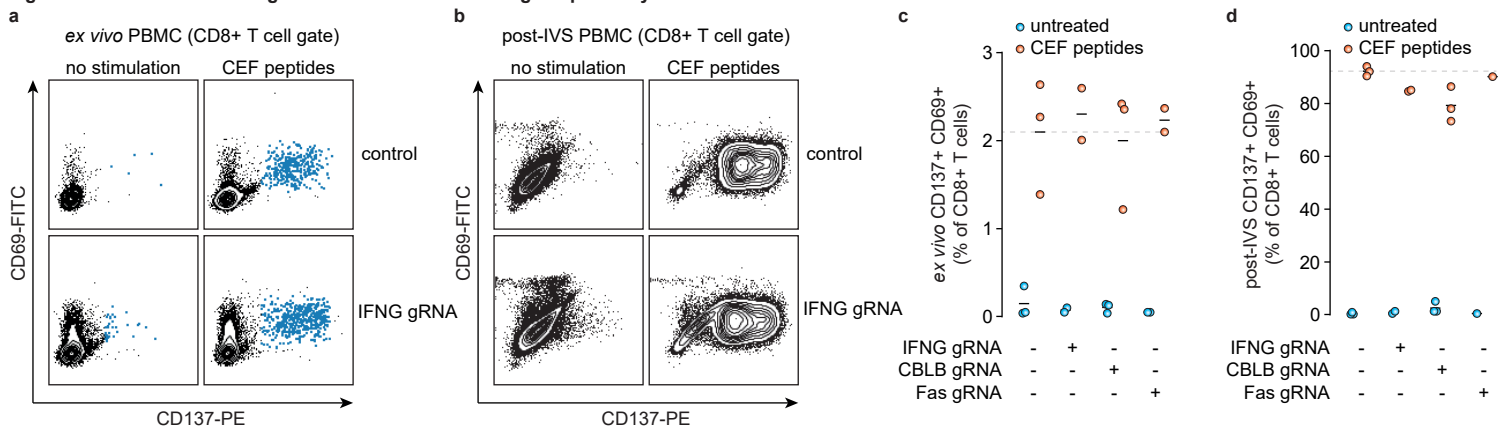

Source: https://biorxiv.org/content/10.1101/2021.11.12.468355v1.full.pdf
